# Supplementary material
Source: MDPI journal article supplement (https://www.mdpi.com/2076-3263/10/11/460)
Supplement: s1 [file s1]

## Sheet: Sheet1
Obs. Pt. #	Lat (N)	Long (E)	Scarp height	Horizontal	Kinematics
1	10.356465°	123.329017°	0.15
2	10.345432°	123.325614°	0.35			*‘L-L’ stands for left-lateral and ‘R-L’ for right-lateral
3	10.332758°	123.328987°	0.75
4	10.330120°	123.329916°	0.5
5	10.322273°	123.329073°	0.25
6	10.303033°	123.327218°	0.2
7	10.295497°	123.328364°	0.5
8	10.283200°	123.329761°	1.2
9	10.255559°	123.325216°	0.65
10	10.242049°	123.320455°	0.4
11	10.235271°	123.317748°	0.3
12	10.229544°	123.314716°	0.25
13	10.228545°	123.313787°	1.1
14	10.210396°	123.302675°	0.35
15	10.195288°	123.296483°	0.6
16	10.190662°	123.294133°	1
17	10.189429°	123.289416°	0.6
18	10.168945°	123.282597°	0.7
19	10.160547°	123.280686°	0.5
20	10.159083°	123.280639°	0.6
21	10.157298°	123.281258°	0.3
22	10.151483°	123.280666°	0.25
23	10.144147°	123.280639°	0.5
24	10.143472°	123.280579°	0.5
25	10.129778°	123.281284°	0.6
26	10.116341°	123.268998°	0.25	0.2	R-L
27	10.114324°	123.269450°	0.9
28	10.109142°	123.269869°	1
29	10.105259°	123.268656°	0.3
30	10.104012°	123.268633°	1.5
31	10.103560°	123.268431°	0.9
32	10.102532°	123.266480°	0.8
33	10.101829°	123.266289°	1.3
34	10.099930°	123.265913°	0.6
35	10.095343°	123.266051°	0.5
36	10.094260°	123.265447°	0.7
37	10.090653°	123.263342°	1.4
38	10.087541°	123.261803°	0.9
39	10.085469°	123.261064°	0.4
40	10.085106°	123.260560°	0.3
41	10.083734°	123.258788°	0.35	0.35	L-L
42	10.082893°	123.259017°	1.2
43	10.081540°	123.258870°	1
44	10.081145°	123.256704°	0.4
45	10.078519°	123.254652°	0.45
46	10.074498°	123.253475°	0.4
47	10.074128°	123.253308°	1.2
48	10.070256°	123.252264°	1
49	10.064682°	123.249402°	0.15
50	10.062722°	123.248813°	0.25	0.05	L-L
51	10.054966°	123.247591°	0.1
52	10.050178°	123.243029°	1.7
53	10.049196°	123.241848°	1.1	0.5	L-L
54	10.046895°	123.239670°	0.1
55	10.043712°	123.239001°	1.5
56	10.043124°	123.238900°	0.4
57	10.041451°	123.238716°	0.1
58	10.033747°	123.236366°	0.3	0.1	R-L
59	10.025400°	123.235046°	0.4
60	10.021704°	123.230307°	1.3
61	10.020186°	123.228308°	2.7
62	10.019499°	123.227823°	1.2
63	10.014462°	123.226296°	1
64	10.012915°	123.226624°	0.4
65	9.999590°	123.217380°	0.3
66	9.997169°	123.212935°	0.25
67	9.993462°	123.210278°	0.55
68	9.987043°	123.206122°	0.4
69	9.972297°	123.198020°	0.3
70	9.967507°	123.192196°	1.2
71	9.965807°	123.189960°	0.35
72	9.946547°	123.181100°	0.3
73	9.918310°	123.164719°	0.85
74	9.899405°	123.149139°	0.7
75	9.878268°	123.150074°	0.8
76	9.852465°	123.143491°	0.5
77	9.817074°	123.143311°	0.35
78	9.799877°	123.135765°	0.6
79	9.797436°	123.137681°	0.3
80	9.776343°	123.150324°	0.4
81	9.764107°	123.147036°	0.35
82	9.746440°	123.152471°	0.3
83	9.744414°	123.152398°	0.3
